# Supplementary material for: A simple and scalable method for preparing low-defect ZIF-8 tubular membranes
Source: Royal Society of Chemistry journal article supplement (doi:10.1039/c3ta12234d), 2013-01-01
Supplement: c3ta12234d.pdf [file c3ta12234d.pdf]

# Supporting Information

## A simple and scalable method for preparing low-defect ZIF-8 tubular membranes

Xiongfeng Zhang,<sup>a\*</sup> Yaguang Liu,<sup>a</sup> Lingyin Kong,<sup>a</sup> Haiou Liu,<sup>a</sup> Jieshan Qiu,<sup>a\*</sup> Wei Han,<sup>b</sup> Lu-Tao Weng,<sup>c</sup> King Lun Yeung<sup>b</sup> and Weidong Zhu<sup>d</sup>

<sup>a</sup> State Key Laboratory of Fine Chemicals, School of Chemical Engineering, Dalian University of Technology, Dalian 116024, P. R. China. \*Corresponding author: [xfzhang@dlut.edu.cn](mailto:xfzhang@dlut.edu.cn)

<sup>b</sup> Department of Chemical and Biomolecular Engineering, Engineering,

<sup>c</sup> Materials Characterization & Preparation Facility, the Hong Kong University of Science and Technology, Clear Water Bay, Kowloon, Hong Kong, P.R. China.

### 1. Experimental details

#### 1.1 Materials and reagents:

The commercial porous  $\alpha$ -alumina tubes were purchased from Hyflux Ltd. Co. and Pall Ltd. Co. The tubes were cut into 60 mm and 75 mm in length respectively and washed sequentially with distilled water and ethanol under ultrasonication for several times to remove impurities and dried for 5 h at 373 K, then calcined for 6 h at 823 K.

Chemicals used in membrane synthesis include zinc chloride ( $\geq 98\%$ ), zinc acetate (98.0%), sodium formate dihydrate ( $\geq 99.5\%$ ), ethylene glycol monomethyl ether (C<sub>3</sub>H<sub>8</sub>O<sub>2</sub>, EGME, 99.0%), monoethanolamine (C<sub>2</sub>H<sub>7</sub>NO, MEA, 99.0%) and methanol anhydrous ( $\geq 99.5\%$ ) purchased from Sinopharm Chemical Reagent Co., Ltd. 2-methylimidazole (Hmim, 99%) was supplied by Sigma-Aldrich Chemical. Co. Ltd.

#### 1.2 ZIF-8 membrane synthesis

ZnO coating sol: A ZnO sol was prepared as follows: 8.34 g Zn(Ac)<sub>2</sub> was dissolved in 48ml EGME under stirring at 343 K. Then 2.4ml MEA was added dropwise into the solution. Finally the sol was aged at room temperature for around 10 h to obtain a EGME sol containing

14.3 wt % zinc for ZnO coating<sup>1, 2</sup>. The internal surface of the cleaned tube was coated with the above zinc sol by a slip-casting technique, followed by drying at 373 K for 1 h. This procedure was repeated for two times to get a continuous sol layer. Then the tube was calcined at 673 K in air with a heating rate of 1 K·min<sup>-1</sup> for 2 h. Finally, the tubes with a thin layer of ZnO coating of around 0.5 μm could be achieved for membrane growth.

ZIF-8 membrane formation: The tube with ZnO layer was wrapped with Teflon tape to avoid ZIF-8 deposition on the outer surface before it was placed in a synthesis solution. Firstly, the tube with ZnO layer was placed in a 0.5 M Hmim methanol solution at 323 K for 2.5 h to activate the coating surface and produce nucleation sites. Secondly, the activated tube was transferred to another synthesis solution with a molar composition of 0.65 HCOONa : 1.0 ZnCl<sub>2</sub> : 1.5 Hmim : 450 MeOH at 373 K for 5 h for membrane growth<sup>3, 4</sup>. The typical synthesis solution was prepared by dissolving in turn 1.0780 g zinc chloride, 0.9720 g 2-methylimidazole and 0.5400 g sodium formate in 80 ml methanol under stirring for 20 min before being transferred to a 100 mL Teflon stainless-steel autoclave. After the solvothermal reaction at 373 K for 5 h, the as-synthesized membrane was taken out, naturally cooled to room temperature and thoroughly washed with methanol to remove some residues. Finally, the membrane was dried at 303 K for 24 h and then stored in a desiccator for later use. Prior to testing gas permeation, two ends of the tube were sealed with epoxy resin glue. By using a brush, a thin and uniform layer of the glue material was applied to both ends (5 mm) of the tube. Then, it was dried overnight at room temperature. After the sealing, the tube was treated under vacuum at 323 K for 12 h to test gas permeation.

## 2. Sample characterization

X-ray diffraction (XRD) measurements were performed on a D/max-2400 X-ray diffractometer using Cu K $\alpha$  radiation in the range of 3-100° operating at 20 kV/100 mA.

Scanning electron microscopy (SEM) images were inspected with a NOVA NANOSEM 450 SEM (FEI company). The working parameters of the SEM are as follows: high voltage (HV) 5-

15 kV, work distance (WD) 5-10 mm and Spot size 3.0. Another SEM is Quanta 200 with the operation parameters of 20~30 kV.

TOF-SIMS measurement were analyzed by an ION-TOF GmbH TOF-SIMS V spectrometer equipped with 25 keV Bi<sup>3+</sup> cluster ion source that has an average pulsed current of 0.1 pA. Spectra were obtained and averaged over three 200 × 200 μm<sup>2</sup> areas. Each spectrum was collected for 40 s at ion flux dosage of less than 2 × 10<sup>11</sup> ions/cm<sup>2</sup>.

TG measurements were performed simultaneously on a Netzsch STA 449 C thermoanalyzer. For this purpose, ca. 1.2 mg of material was filled into alumina crucibles and heated in a flow of air with a ramp of 5 K/min from 303 K up to 873 K.

The gas permeation properties of the ZIF-8 membrane were evaluated using single gases of H<sub>2</sub> (0.29 nm), CO<sub>2</sub> (0.33 nm), N<sub>2</sub> (0.36 nm), CH<sub>4</sub> (0.38 nm), C<sub>3</sub>H<sub>8</sub> (0.43 nm), C<sub>4</sub>H<sub>10</sub> (0.48 nm), and SF<sub>6</sub> (0.51 nm) in a permeation set up as shown in Fig. S1. The membrane was placed in a home-made stainless steel module with a cylindrical geometry. The feed stream was pressurized, while downstream pressure was maintained at atmospheric pressure. The pressure difference through the membrane was tested at 0.1 MPa. The gas flux was measured by a soap film bubble flow meter. Before the measurement of each gas species (except for H<sub>2</sub>), the membrane permeation system was swept with H<sub>2</sub> to desorb the trapped gas molecules in the ZIF-8 pores. The permeance,  $P_i$ , is defined as:

$$P_i = \frac{N_i}{\Delta P_i A}$$

where  $N_i$  is the permeate rate of component  $i$  (mol·s<sup>-1</sup>),  $\Delta P_i$  the trans-membrane pressure difference of  $i$  (Pa), and  $A$  is the membrane area (m<sup>2</sup>). The ideal separation factor is calculated as the ratio of permeance  $P_i$  and  $P_j$ .

$$\alpha_{i/j} = \frac{P_i}{P_j}$$

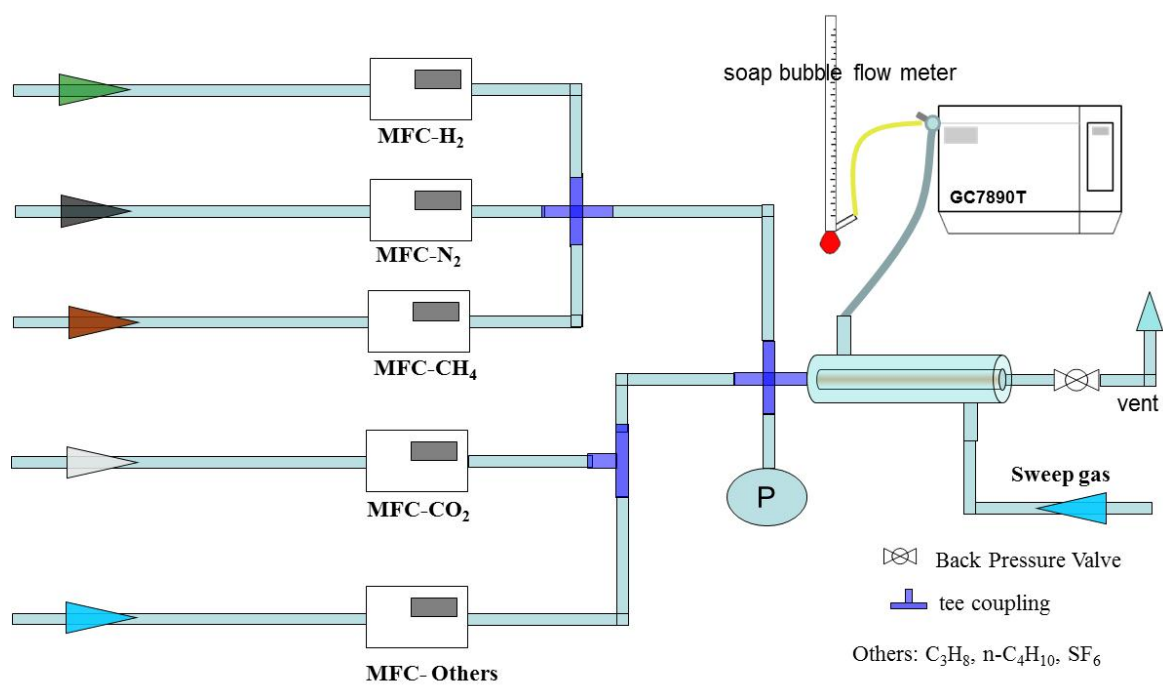

**Fig. S1 Schematic diagram of the gas permeation apparatus**

### 3. Result and discussion

#### (1) Porous $\alpha$ -alumina tubes as supports

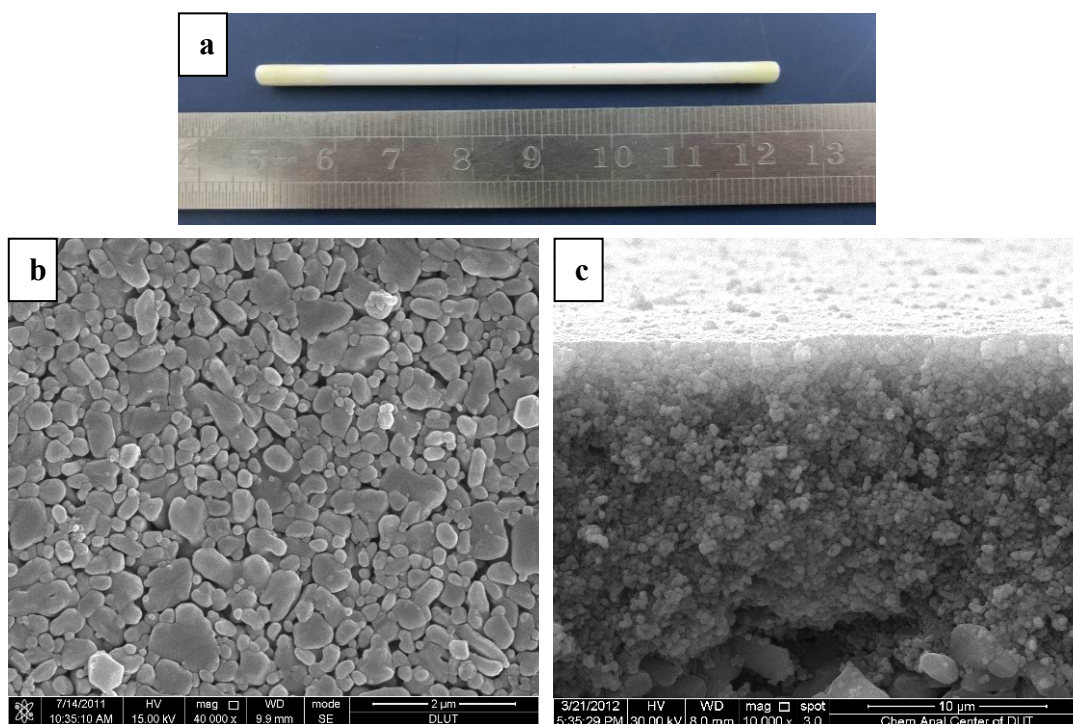

**Fig. S2 Photo and SEM images of the HFT support:**

a: HFT; b: Top view; c: Cross-section view

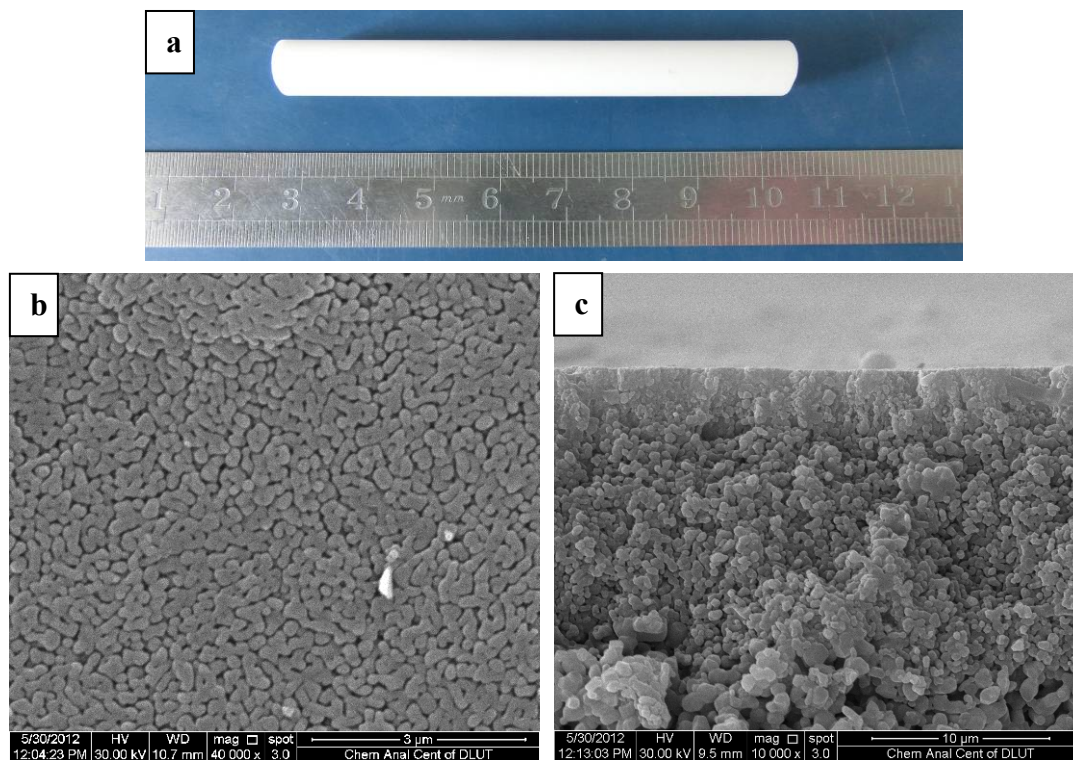

**Fig. S3 Photo and SEM images of the UHFT support:**

a: UHFT; b: Top view; c: Cross-section view

## (2) The tubes coated with a containing ZnO sol

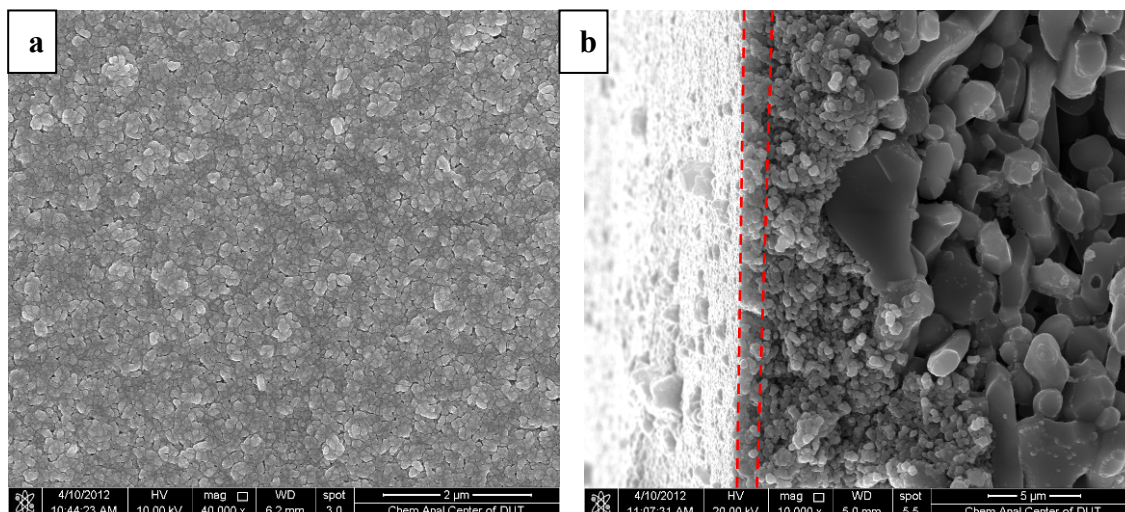

Fig. S4 SEM images of the tube coated with the sol:

a: Top view; b: Cross-section view

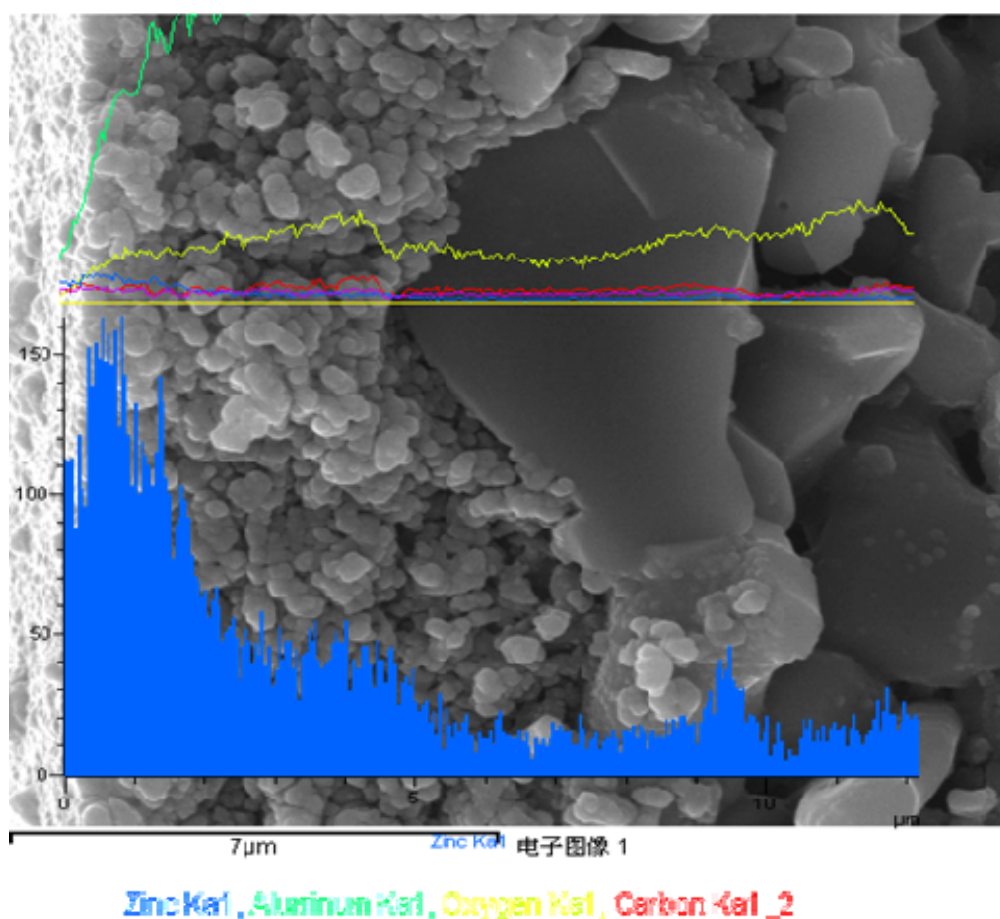

Fig. S5 Energy-dispersive X-ray spectroscopy (EDXS) of the tube's cross section after coating with the sol.

### (3) Surface of the tubes with an ultrathin ZnO layer after activation

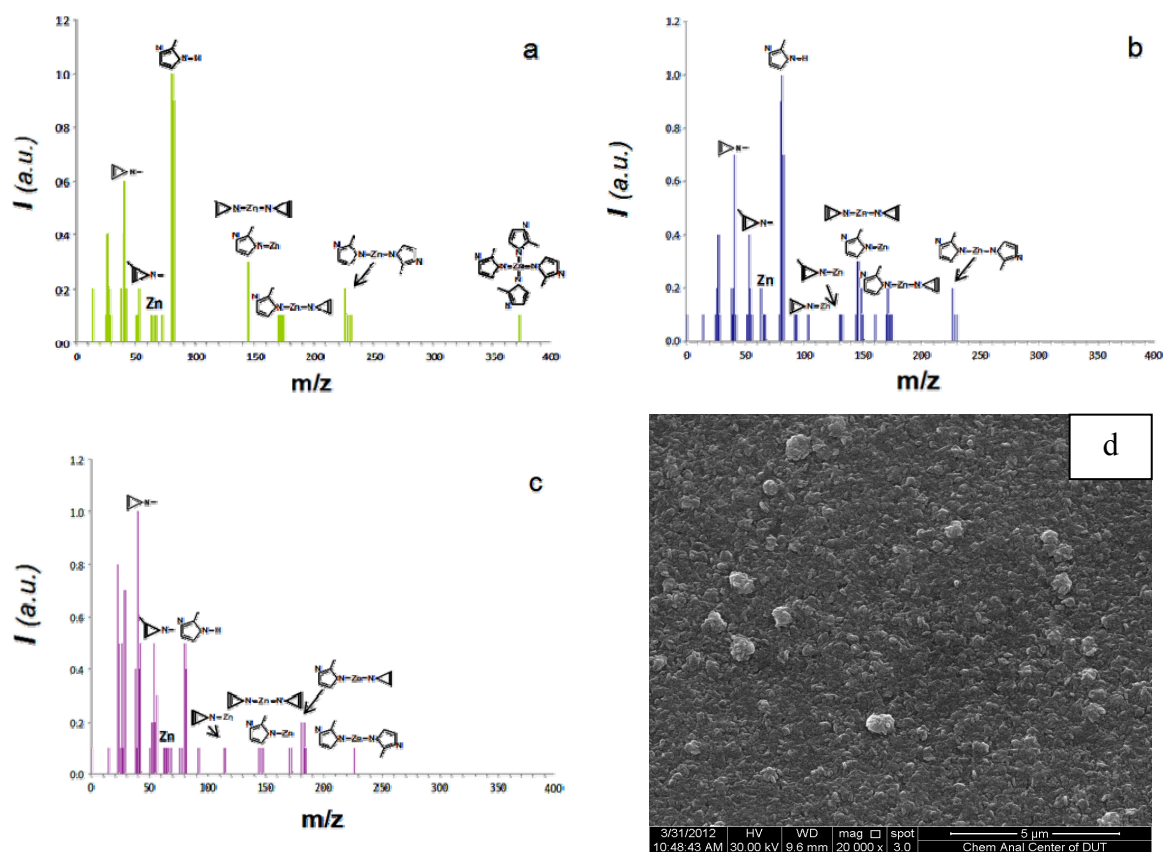

**Fig. S6** ToF-SIMS spectra of the ZnO layer activated with Hmim (a), ZIF-8 nanoparticle (b), and ZIF-8 membrane (c) and (d) SEM image of the tube with a ZnO layer after activation.

#### (4) ZIF-8 membrane formed on the tubes coated with a ZnO layer

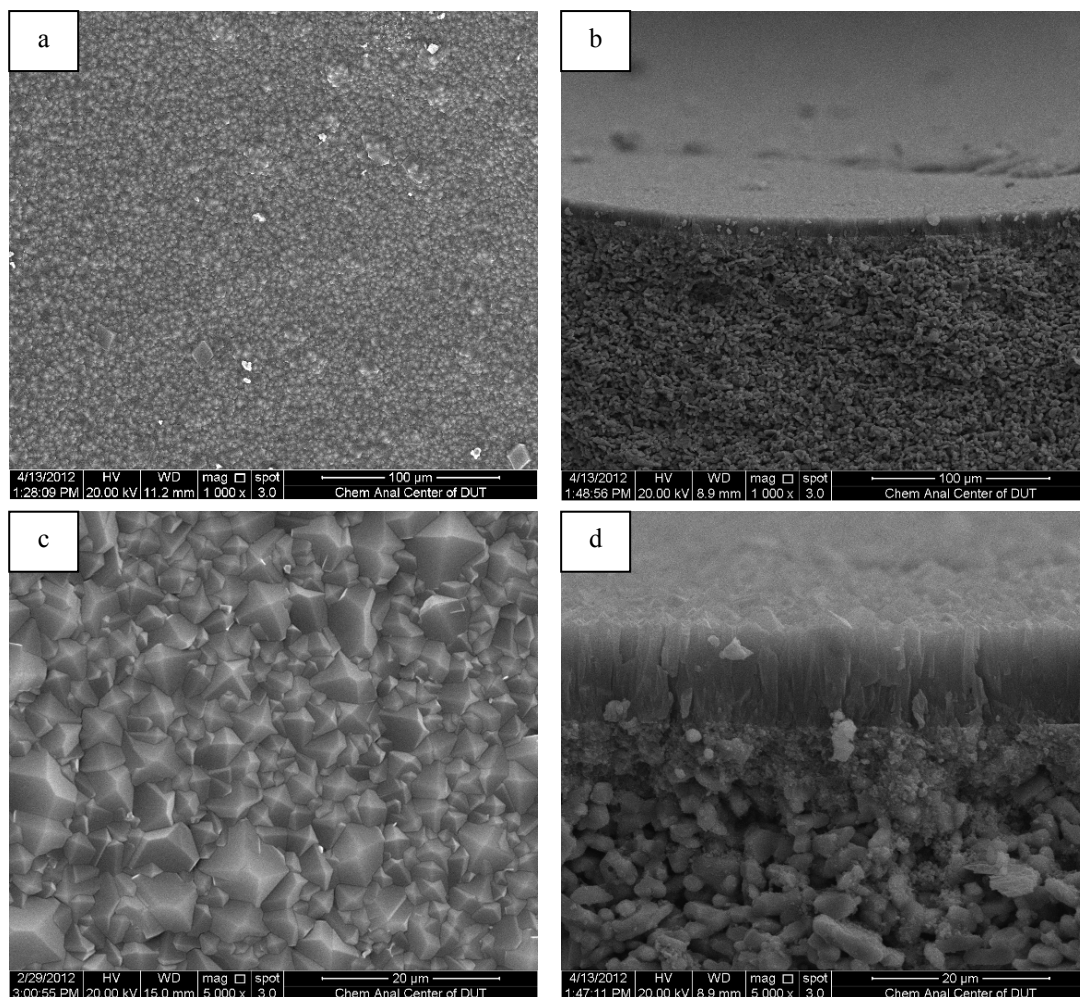

**Fig. S7** SEM images of the tube with a ZnO layer after membrane growth  
a, c: Top view; b, d: Cross-section view; c, d: High magnification of a, b

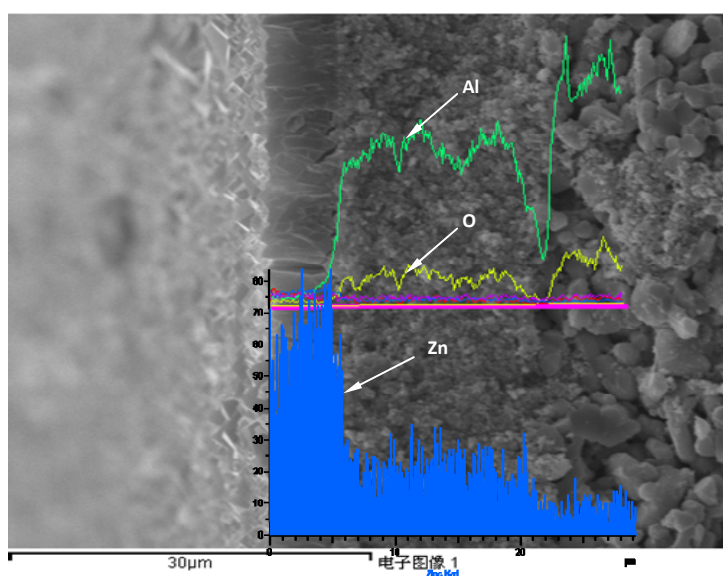

**Fig. S8** Energy-dispersive X-ray spectroscopy (EDXS) of the membrane grown on tube coated with ZnO, showing the intermediate Zn element is higher than the membrane and the supporting.



**(5) The membrane grown on the tube without ZnO coating**

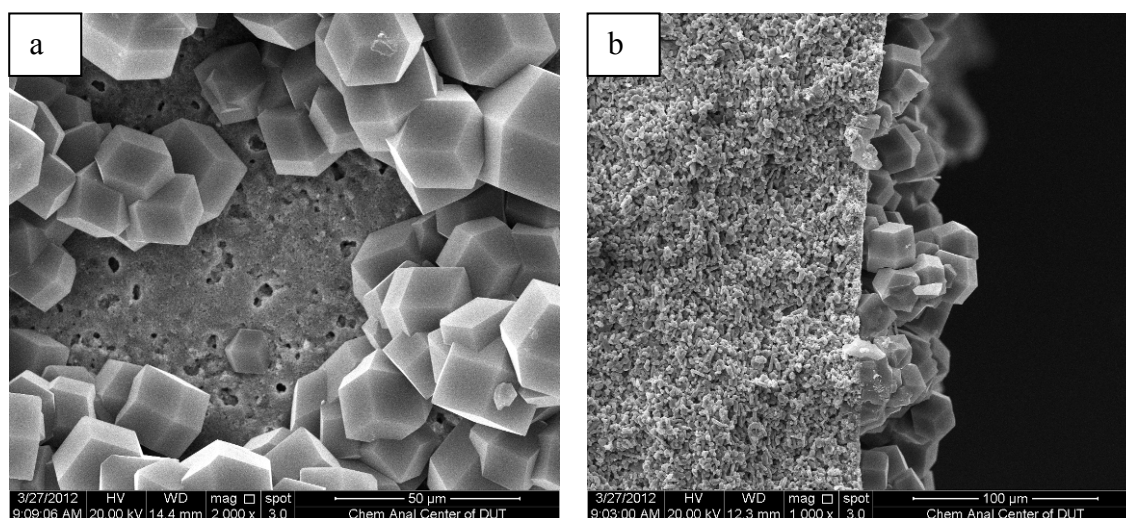

**Fig. S9 SEM images of the membrane grown on the tube without ZnO layer. a: Top view and b: Cross-section view.**

**(6) The membrane grown on the tube with ZnO coating without activation**

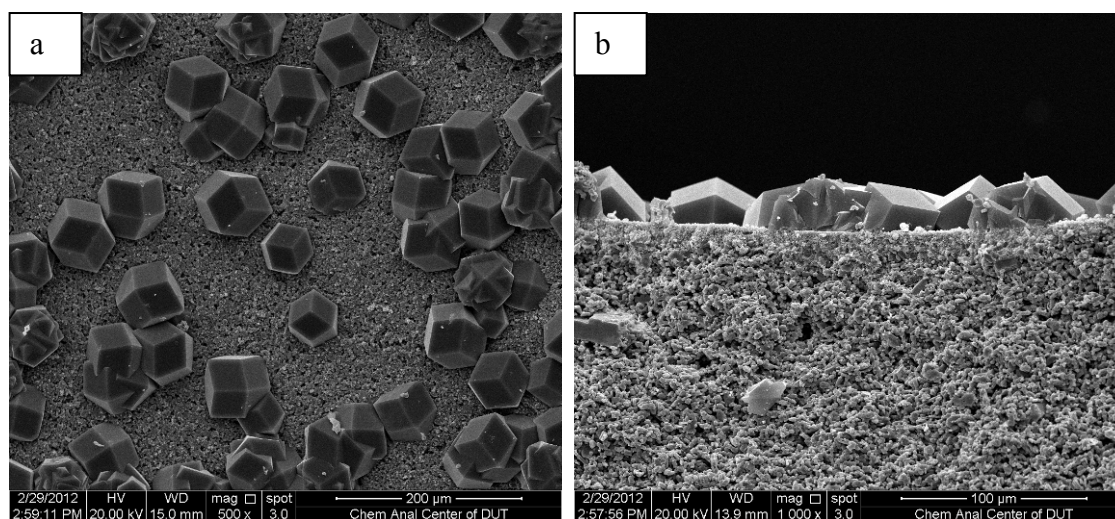

**Fig. S10 SEM images of the membrane grown on the tube with ZnO coating without activation: a: Top view; b: Cross section;**

## (7) XRD analysis of the samples

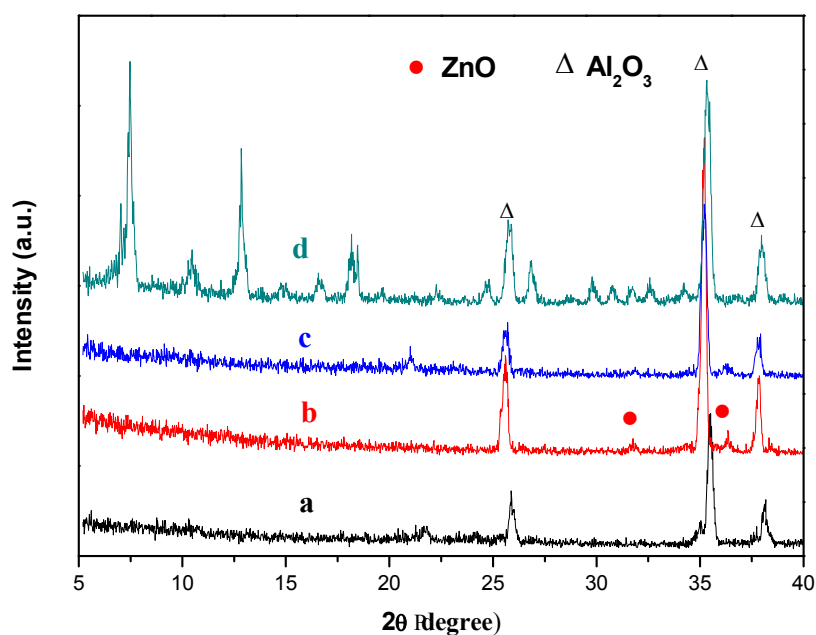

**Fig. S11 XRD patterns of the substrate and membrane**  
**a: Alumina tube; b: Alumina tube with ZnO coating;**  
**c: Alumina tube with ZnO coating after activation; d: the membrane**

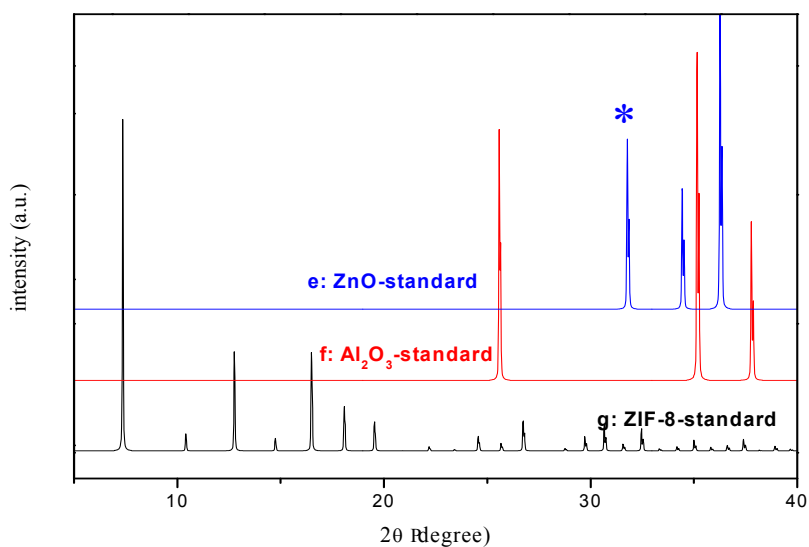

**Fig. S12 XRD patterns of different simulated samples**

It is clearly seen that after the treatment by Hmim methanol solution, there is no ZIF-8 peak on the surface of the support modified with ZnO layer.

### (8) TGA analysis of ZIF-8 powders

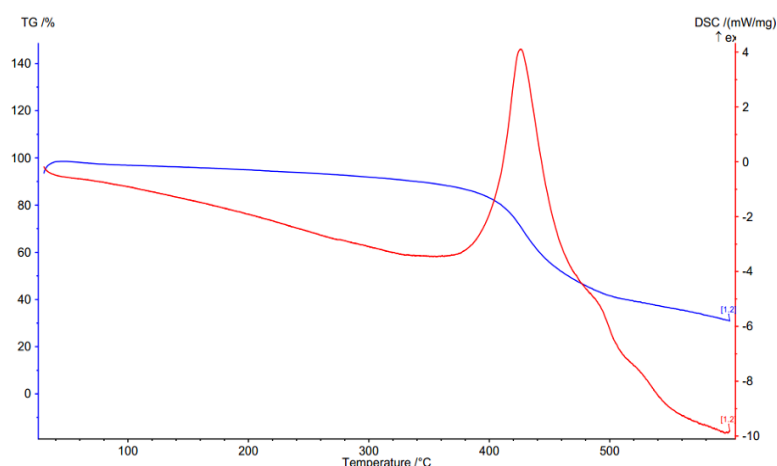

Fig. S13 TGA curve of ZIF-8 powders obtained from the membrane synthesis

### (9) ZIF-8 membrane grown on the Zinc foil dealt with $H_2O_2$

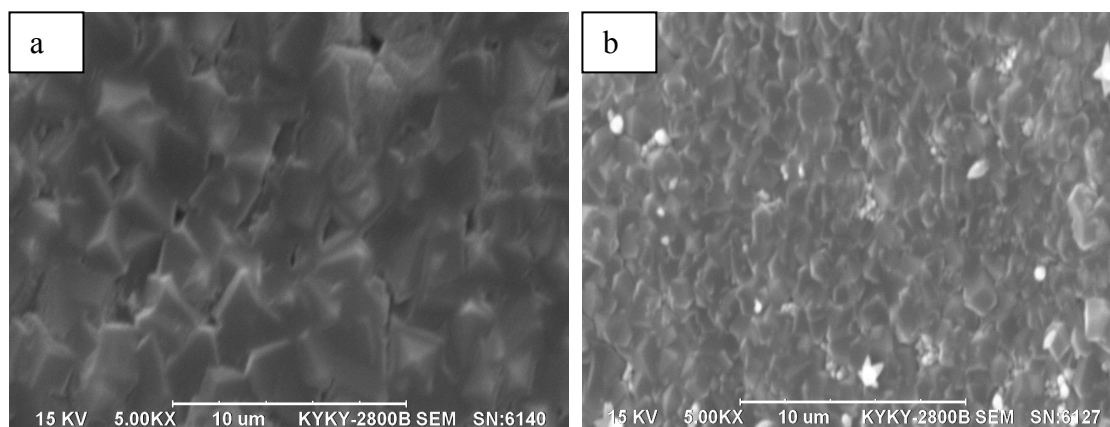

Fig. S14 SEM of (a) ZIF-8 membrane grown the Zinc foil treated with  $H_2O_2$  and (b) the surface of Zinc foil treated with  $H_2O_2$

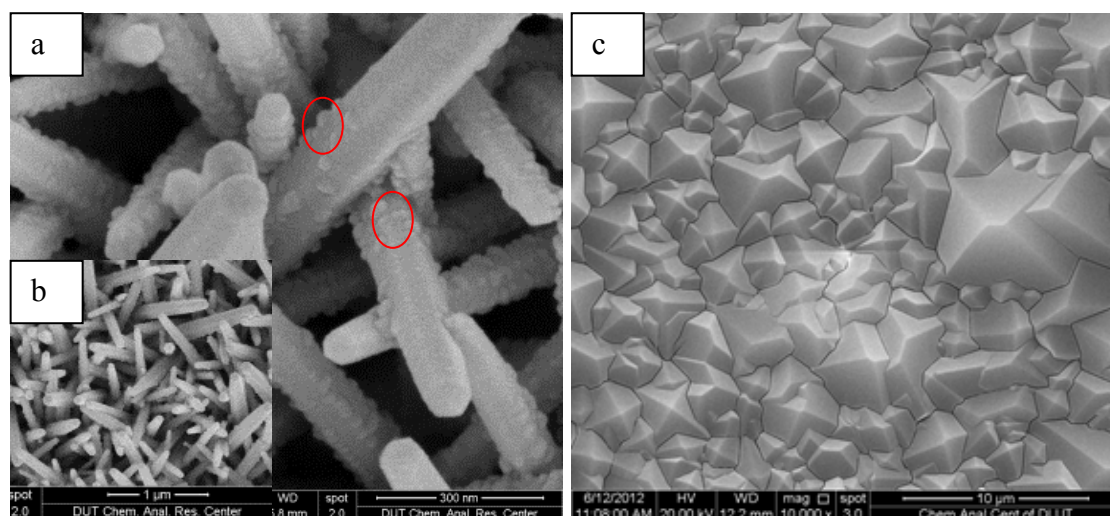

Fig. S15 SEM images of the samples from the ZnO rods (a, b) activated with Hmim methanol solution at 323K for 2.5 h and ZIF-8 membrane grown on it (c)

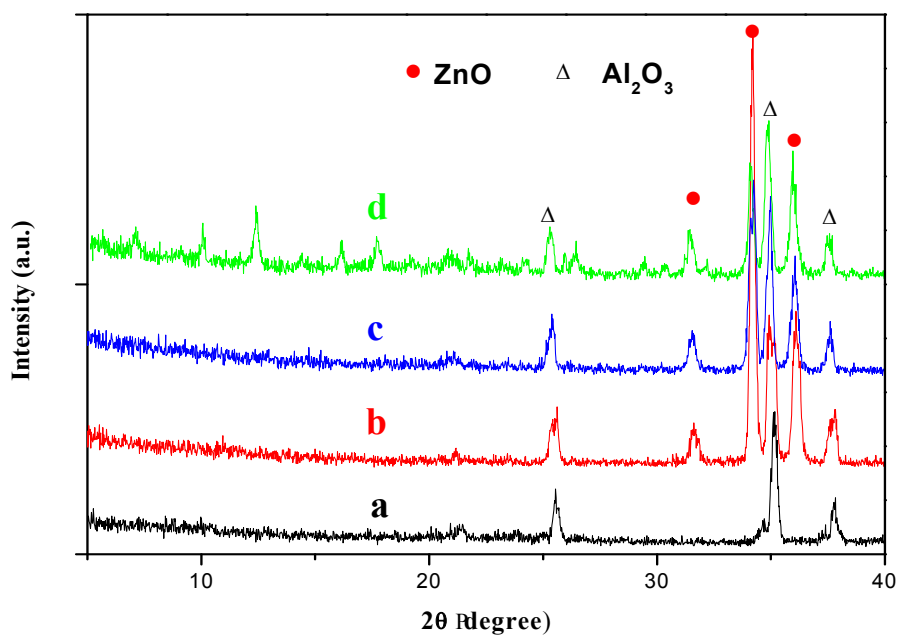

**Fig. S16** XRD patterns of the samples; a: Alumina disc; b: Alumina disc with ZnO rods; c: Alumina disc with ZnO rods after activation with Hmim methanol solution at 323 K for 2.5 h; d: ZIF-8 layer grown on the disc with rods after activation.

#### (10) Single gas permeation test

##### Permeances for the bare hollow fiber tube and tube coated with ZnO layer

It is from the Fig. S14 seen that after the treatment, the gas permeance of the modified tube is slightly lower than that of the bare one.

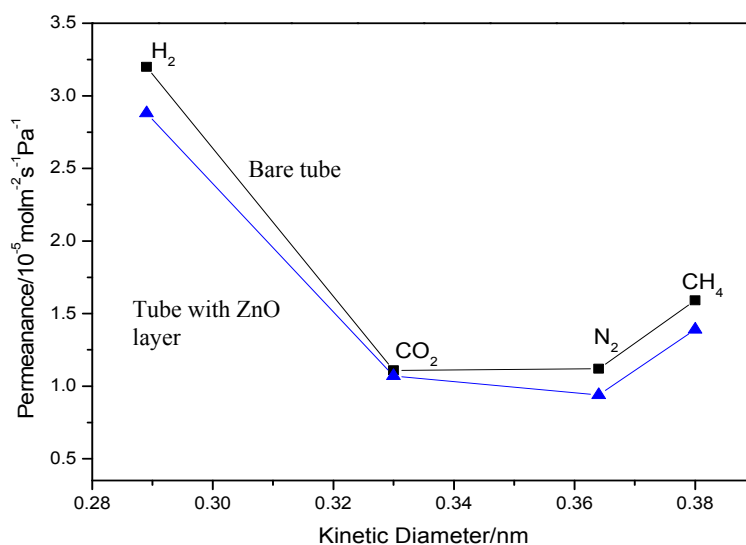

**Fig. S17** Single gas permeances through the bare HFT substrate and tube coated with an ultrathin ZnO layer

**Table S1 Results of single component permeation through three ZIF-8 membranes supported on HFT tubes with 30 mm in length prepared in parallel batches.<sup>[a]</sup>**

| Membr. code | Permeance/ $10^{-8} \text{ mol}\cdot\text{m}^{-2}\cdot\text{s}^{-1}\cdot\text{Pa}^{-1}$ |                |                 | Permselectivity                |                                 |
|-------------|-----------------------------------------------------------------------------------------|----------------|-----------------|--------------------------------|---------------------------------|
|             | H <sub>2</sub>                                                                          | N <sub>2</sub> | CO <sub>2</sub> | H <sub>2</sub> /N <sub>2</sub> | H <sub>2</sub> /CO <sub>2</sub> |
| SM1         | 99.8                                                                                    | 9.2            | 19.3            | 10.9                           | 5.2                             |
| SM2         | 66.5                                                                                    | 6.0            | 11.4            | 11.0                           | 5.8                             |
| SM3         | 60.9                                                                                    | 6.3            | 11.8            | 9.6                            | 5.2                             |

[a] Permeation performed at 298 K and 0.1 MPa.

*Permeation test for the six membranes on the 60 mm long HFT supports obtained from one batch synthesis by this new method under the same condition.*

In one batch synthesis, six ZIF-8 membranes on HFT supports with 60 mm in length were obtained and their permeation properties were tested as shown in Table S2 to S3.

**Table S2 Permeances through the six ZIF-8 membranes on the HFT substrates with 60 mm in length at 298 K and 0.1 MPa**

| Membr. code | Permeance ( $\times 10^{-8} \text{ mol}\cdot\text{m}^{-2}\cdot\text{s}^{-1}\cdot\text{Pa}^{-1}$ ) |                 |                |                 |                 |
|-------------|---------------------------------------------------------------------------------------------------|-----------------|----------------|-----------------|-----------------|
|             | H <sub>2</sub>                                                                                    | CO <sub>2</sub> | N <sub>2</sub> | CH <sub>4</sub> | SF <sub>6</sub> |
| M1          | 72.7                                                                                              | 14.2            | 8.98           | 9.22            | 0.36            |
| M2          | 83.5                                                                                              | 17.2            | 11.5           | 12.0            | 0.49            |
| M3          | 61.8                                                                                              | 12.0            | 7.7            | 7.68            | 0.38            |
| M4          | 88.9                                                                                              | 26.8            | 15.3           | 15.4            | 1.13            |
| M5          | 61.3                                                                                              | 11.0            | 7.56           | 7.74            | 0.32            |
| M6          | 65.2                                                                                              | 13.5            | 8.02           | 8.31            | 0.39            |

**Table S3 Ideal selectivities through the six ZIF-8 membranes on the HFT substrates with 60 mm in length at 298 K and 0.1 MPa**

| Membr. code | Permselectivity                 |                                |                                 |                                 |
|-------------|---------------------------------|--------------------------------|---------------------------------|---------------------------------|
|             | H <sub>2</sub> /CO <sub>2</sub> | H <sub>2</sub> /N <sub>2</sub> | H <sub>2</sub> /CH <sub>4</sub> | H <sub>2</sub> /SF <sub>6</sub> |
| M1          | 5.1                             | 8.1                            | 7.9                             | 201.7                           |
| M2          | 4.8                             | 7.3                            | 6.9                             | 168.8                           |
| M3          | 5.1                             | 8.0                            | 8.0                             | 161.5                           |
| M4          | 3.3                             | 5.8                            | 5.8                             | 78.5                            |
| M5          | 5.6                             | 8.1                            | 7.9                             | 192.1                           |
| M6          | 5.6                             | 8.1                            | 7.8                             | 164.5                           |

*Single gas permeation through the ZIF-8 membranes on the 75 mm long HFT and UHFT supports by this new method under the same condition as shown in Table S4 to S7.*

**Table S4 Single gas permeances through the ZIF-8 membranes on the HFT substrates with 75 mm in length at 298 K and 0.1 MPa except for the permeance of *n*-C<sub>4</sub>H<sub>10</sub> at 0.05 MPa.**

| Membrane No. | Permeance ( $\times 10^{-8} \text{ mol} \cdot \text{m}^{-2} \cdot \text{s}^{-1} \cdot \text{Pa}^{-1}$ ) |                 |                |                 |                               |                                          |                 |
|--------------|---------------------------------------------------------------------------------------------------------|-----------------|----------------|-----------------|-------------------------------|------------------------------------------|-----------------|
|              | H <sub>2</sub>                                                                                          | CO <sub>2</sub> | N <sub>2</sub> | CH <sub>4</sub> | C <sub>3</sub> H <sub>8</sub> | <i>n</i> -C <sub>4</sub> H <sub>10</sub> | SF <sub>6</sub> |
| HFM1         | 97.4                                                                                                    | 26.5            | 12.3           | 12.9            | 3.7                           | 1.0                                      | 0.89            |
| HFM2         | 68.6                                                                                                    | 14.4            | 9.7            | 10.0            | 1.8                           | 0.9                                      | 0.38            |
| HFM3         | 63.9                                                                                                    | 12.2            | 7.8            | 7.9             | 0.9                           | 0.6                                      | 0.30            |

**Table S5 Ideal separation factor through the ZIF-8 membranes on the HFT substrates with 75 mm in length at 298 K and 0.1 MPa except for the permeance of *n*-C<sub>4</sub>H<sub>10</sub> at 0.05 MPa.**

| Membrane No. | Permselectivity                 |                                |                                 |                                               |                                                           |                                 |
|--------------|---------------------------------|--------------------------------|---------------------------------|-----------------------------------------------|-----------------------------------------------------------|---------------------------------|
|              | H <sub>2</sub> /CO <sub>2</sub> | H <sub>2</sub> /N <sub>2</sub> | H <sub>2</sub> /CH <sub>4</sub> | H <sub>2</sub> /C <sub>3</sub> H <sub>8</sub> | H <sub>2</sub> / <i>n</i> -C <sub>4</sub> H <sub>10</sub> | H <sub>2</sub> /SF <sub>6</sub> |
| HFM1         | 3.7                             | 7.9                            | 7.5                             | 26.3                                          | 96.5                                                      | 109.5                           |
| HFM2         | 4.8                             | 7.0                            | 6.8                             | 38.1                                          | 72.9                                                      | 180.4                           |
| HFM3         | 5.2                             | 8.2                            | 8.1                             | 68.7                                          | 106.6                                                     | 213.1                           |

**Table S6 Single gas permeances through the ZIF-8 membranes on the UHFT substrates at 298 K and 0.1 MPa except for the permeance of *n*-C<sub>4</sub>H<sub>10</sub> at 0.05 MPa.**

| Membrane No. | Permeance ( $\times 10^{-8} \text{ mol} \cdot \text{m}^{-2} \cdot \text{s}^{-1} \cdot \text{Pa}^{-1}$ ) |                 |                |                 |                               |                                          |                 |
|--------------|---------------------------------------------------------------------------------------------------------|-----------------|----------------|-----------------|-------------------------------|------------------------------------------|-----------------|
|              | H <sub>2</sub>                                                                                          | CO <sub>2</sub> | N <sub>2</sub> | CH <sub>4</sub> | C <sub>3</sub> H <sub>8</sub> | <i>n</i> -C <sub>4</sub> H <sub>10</sub> | SF <sub>6</sub> |
| UHFM1        | 20.8                                                                                                    | 5.12            | 2.02           | 2.00            | 0.139                         | 0.106                                    | 0.07398         |
| UHFM2        | 19.8                                                                                                    | 4.69            | 2.05           | 2.06            | 0.130                         | 0.115                                    | 0.0764          |

**Table S7 Ideal selectivities through the ZIF-8 membranes on the UHFT substrates at 298 K and 0.1 MPa except for the permeance of *n*-C<sub>4</sub>H<sub>10</sub> at 0.05 MPa.**

| Membrane No. | Permselectivity                 |                                |                                 |                                               |                                                           |                                 |
|--------------|---------------------------------|--------------------------------|---------------------------------|-----------------------------------------------|-----------------------------------------------------------|---------------------------------|
|              | H <sub>2</sub> /CO <sub>2</sub> | H <sub>2</sub> /N <sub>2</sub> | H <sub>2</sub> /CH <sub>4</sub> | H <sub>2</sub> /C <sub>3</sub> H <sub>8</sub> | H <sub>2</sub> / <i>n</i> -C <sub>4</sub> H <sub>10</sub> | H <sub>2</sub> /SF <sub>6</sub> |
| UHFM1        | 4.1                             | 10.3                           | 10.4                            | 149.6                                         | 195.7                                                     | 281.5                           |
| UHFM2        | 4.7                             | 9.6                            | 9.6                             | 151.4                                         | 172.2                                                     | 258.6                           |

HFM represents the ZIF-8 membrane on the HFT substrate;

UHFM represents the ZIF-8 membrane on the UHFT substrate.

## References

1. S. Aksoy, Y. Caglar, S. Ilican and M. Caglar. *Superlattices Microstruct.*, 2011, **50**, 470-479.
2. E. Keskenler, S. Doğan, B. Diyarbakır, S. Duman and B. Gürbulak. *J. Sol-Gel Sci. Technol.*, 2011, **60**, 66-70.
3. H. Bux, C. Chmelik, R. Krishna and J. Caro. *J. Membr. Sci.*, 2011, **369**, 284-289.
4. H. Bux, A. Feldhoff, J. Cravillon, M. Wiebcke, Y.-S. Li and J. Caro. *Chem. Mater.*, 2011, **23**, 2262-2269.

**Table S8 Comparison of single gas permeances between the MOF membranes prepared in this work and the membranes from the literatures**

| Membranes          | Support shape                                 | pore size /nm | Area /cm <sup>2</sup> | Permeance                                                                   |                                |                                 | Ref.      |
|--------------------|-----------------------------------------------|---------------|-----------------------|-----------------------------------------------------------------------------|--------------------------------|---------------------------------|-----------|
|                    |                                               |               |                       | ( $\times 10^{-8}$ mol·m <sup>-2</sup> ·s <sup>-1</sup> ·Pa <sup>-1</sup> ) | H <sub>2</sub> /N <sub>2</sub> | H <sub>2</sub> /CH <sub>4</sub> |           |
| ZIF-8              | $\alpha$ -Al <sub>2</sub> O <sub>3</sub> tube | 100           | 5.2                   | 63.9                                                                        | 7.2                            | 7.1                             | This work |
| ZIF-8              | $\alpha$ -Al <sub>2</sub> O <sub>3</sub> tube | 100           | 14.3                  | 20.8                                                                        | 10.3                           | 10.4                            | This work |
| SIM-1              | $\alpha$ -Al <sub>2</sub> O <sub>3</sub> tube | 200           | 32.97                 | 8.5                                                                         | 2.6                            | --                              | [1]       |
| ZIF-8              | Polymer tube                                  | 100           | 80                    | 197                                                                         | 4.3                            | --                              | [2]       |
| ZIF-8              | $\alpha$ -Al <sub>2</sub> O <sub>3</sub> tube | 200           | 2.1                   | 99                                                                          | 3.2                            | 3.96                            | [3]       |
| ZIF-8 <sup>1</sup> | $\alpha$ -Al <sub>2</sub> O <sub>3</sub> tube | 3000          | 25.3                  | 5730                                                                        | 15.4                           | --                              | [4]       |
| ZIF-8              | YSZ tube <sup>2</sup>                         | 100           | 1.88                  | 154                                                                         | 11                             | 13                              | [5]       |
| ZIF-8              | $\alpha$ -Al <sub>2</sub> O <sub>3</sub> disc | --            | --                    | 17                                                                          | 5.7                            | --                              | [6]       |
| ZIF-8              | $\alpha$ -Al <sub>2</sub> O <sub>3</sub> disc | --            | 3.8                   | 23                                                                          | 9.6                            | 10                              | [7]       |
| ZIF-8              | $\alpha$ -Al <sub>2</sub> O <sub>3</sub> disc | --            | 2.5                   | 10                                                                          | --                             | 16                              | [8]       |
| ZIF-8              | $\alpha$ -Al <sub>2</sub> O <sub>3</sub> disc | 200           | 3.8                   | 40                                                                          | ~8.5                           | ~9.6                            | [9]       |
| ZIF-8              | $\alpha$ -Al <sub>2</sub> O <sub>3</sub> disc | --            | 2.2                   | 17                                                                          | 11.6                           | 13                              | [10]      |
| ZIF-8              | Titania disc                                  | 100           | 2.5                   | 5.1                                                                         | 11.6                           | 11.3                            | [11]      |
| ZIF-8              | $\alpha$ -Al <sub>2</sub> O <sub>3</sub> disc | --            | --                    | 17                                                                          | 11.6                           | 13.0                            | [12]      |

<sup>1</sup> In the membrane, the porous tube was functionalized with 3-aminopropyltriethoxysilane (APTES);

<sup>2</sup> YSZ\* tube: hollow yttria-stabilized zirconia fiber support



## References

1. Aguado, S.; Nicolas, C.-H.; Moizan-Basle, V.; Nieto, C.; Amrouche, H.; Bats, N.; Audebrand, N.; Farrusseng, D. *New J. Chem.* **2011**, *35*, 41.
2. Yao, J.; Dong, D.; Li, D.; He, L.; Xu, G.; Wang, H. *Chem. Commun.* **2011**, *47*, 2559.
3. G. Xu, J. Yao, K. Wang, L. He, P. A. Webley, C.-S. Chen and H. Wang. *J. Membr. Sci.*, 2011, **385-386**, 187-193.
4. Z. Xie, J. H. Yang, J. Q. Wang, J. Bai, H. M. Yin, B. Yuan, J. M. Lu, Y. Zhang, L. Zhou and C. Y. Duan. *Chem. Commun.*, 2012, **48**, 5977.
5. Y. Pan, B. Wang and Z.P. Lai, *J. Membr. Sci.*, 2012, **421-422**, 292-298.
6. L. Li, J. Yao, R. Chen, L. He, K. Wang and H. Wang, *Microporous. Mesoporous. Mater.*, 2013, **168**, 15-18.
7. M. Shah, H. T. Kwon, V. Tran, S. Sachdeva and H.-K. Jeong, *Microporous. Mesoporous. Mater.*, 2013, **165**, 63-69.
8. H. Bux, A. Feldhoff, J. Cravillon, M. Wiebcke, Y.-S. Li and J. Caro. *Chem. Mat.*, 2011, **23**, 2262-2269.
9. Y. Pan and Z.P. Lai. *Chem. Commun.*, 2011, **47**, 10275-10277.
10. M. C. McCarthy, V. Varela-Guerrero, G. V. Barnett and H.-K. Jeong. *Langmuir*, 2010, **26**, 14636-14641.
11. H. Bux, F. Liang, Y. Li, J. Cravillon, M. Wiebcke and J. r. Caro. *J. Am. Chem. Soc.*, 2009, **131**, 16000-16001.
12. McCarthy, M. C.; Varela-Guerrero, V.; Barnett, G. V.; Jeong, H.-K. *Langmuir* **2010**, *26*, 14636.
